# Supplementary material for: Validity and reliability of an adapted arabic version of the long international physical activity questionnaire
Source: Springer Nature journal article supplement (doi:10.1186/s12889-017-4599-7), 2017-07-24
Supplement: MOESM2 [file 13323990]

**Table S1: Content validity of the A-IPAQ**

| Item                                            | Communality | Factor loadings |
|-------------------------------------------------|-------------|-----------------|
| <b>Factor 1: Job-related PA</b>                 |             |                 |
| Total duration of walking                       | 0.795       | 0.897           |
| Total duration of vigorous PA                   | 0.754       | 0.860           |
| <b>Factor 2: Leisure PA except walks</b>        |             |                 |
| Total duration of bike movements                | 0.646       | 0.777           |
| Total duration of moderate leisure PA           | 0.594       | 0.770           |
| Total duration of vigorous leisure PA           | 0.524       | 0.615           |
| <b>Factor 3: Indoor sedentarity and PA</b>      |             |                 |
| Mean daily sitting last week end                | 0.721       | 0.870           |
| Mean daily sitting last week days               | 0.709       | 0.631           |
| Moderate in-house PA                            | 0.573       | -0.558          |
| <b>Factor 4: Additional PA</b>                  |             |                 |
| Total moderate PA at work                       | 0.616       | 0.766           |
| Total walking to move from one place to another | 0.680       | 0.753           |
| Total vigorous PA garden/yard                   | 0.525       | 0.578           |
| <b>Factor 5: Total motorized movement</b>       | 0.742       | 0.858           |
| <b>Factor 6: Total leisure walk</b>             | 0.880       | 0.949           |
