# Supplementary material for: Validity and reliability of an adapted arabic version of the long international physical activity questionnaire
Source: Springer Nature journal article supplement (doi:10.1186/s12889-017-4599-7), 2017-07-24
Supplement: MOESM3 [file 13323990]

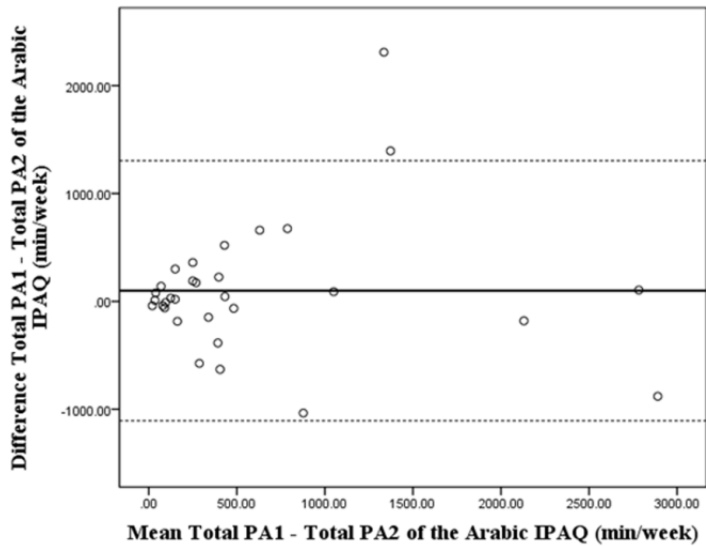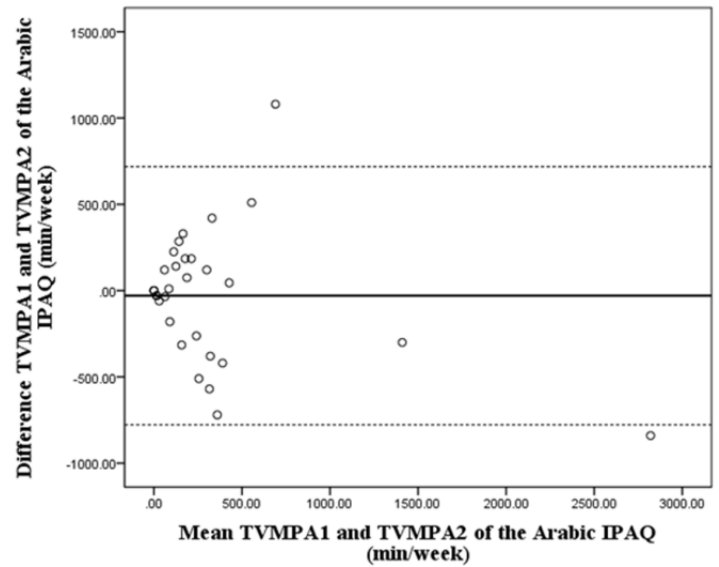

**Figure S2:**

2a: Bland-Altman plot of Total PA1 and Total PA2 determined on the first and the second administrations of the A-IPAQ (min/week). Mean difference = 99.8 min/week, 95% limits of agreement = -1105.3; 1304.9.

2b: Bland-Altman plot of Total Vigorous and Moderate PA1 and PA2 determined on the first and the second administrations of the A-IPAQ (min/week). Mean difference = -29.7 min/week, 95% limits of agreement = -777.6; 718.2.
